# Supplementary material for: Ultrahigh yields of giant vesicles obtained through mesophase evolution and breakup
Source: Royal Society of Chemistry journal article supplement (doi:10.1039/d4sm01109k), 2024-01-01
Supplement: d4sm01109k1.pdf [file d4sm01109k1.pdf]

**Electronic Supplementary Information**

**Ultrahigh yields of giant vesicles obtained through mesophase evolution and breakup**

Alexis Cooper<sup>a</sup> and Anand Bala Subramaniam<sup>\*b</sup>

<sup>a</sup> Department of Chemistry and Biochemistry, University of California, Merced, Merced, CA 95343, United States.

<sup>b</sup> Department of Bioengineering, University of California, Merced, Merced, CA 95343, United States.

**Corresponding Author:** [asubramaniam@ucmerced.edu](mailto:asubramaniam@ucmerced.edu)

## Calculation of Debye screening length

We follow reference<sup>1</sup> to calculate the Debye screening length. The range of the electrostatic repulsion depends on the Debye length,  $\frac{1}{\kappa_D}$ , where  $\kappa_D$  is:

$$\kappa_D = \sqrt{\frac{N_A e^2}{\epsilon_0 \epsilon k_B T} \sum_i [C]_i z_i^2} \quad (1)$$

In this equation,  $N_A$  is Avogadro's number,  $e$  is the elementary charge,  $\epsilon_0$  is the permittivity of free space,  $\epsilon$  is the dielectric constant,  $k_B$  is the Boltzmann constant,  $T$  is the absolute temperature,  $[C]$  is the concentration of ionic species  $i$ , and  $z$  is the charge of ionic species  $i$ . In unbuffered ultrapure water with dissolved nonionic solutes in equilibrium with atmosphere, the Debye length is  $\sim 170$  nm while in 1 mM NaCl it is 9.6 nm. In  $1 \times$  PBS, the Debye length is 0.75 nm.

## Supplementary reference

1. Cooper, A., Girish, V. & Subramaniam, A.B. Osmotic Pressure Enables High-Yield Assembly of Giant Vesicles in Solutions of Physiological Ionic Strengths. *Langmuir* **39**, 5579–5590 (2023).

## Supplementary Figures

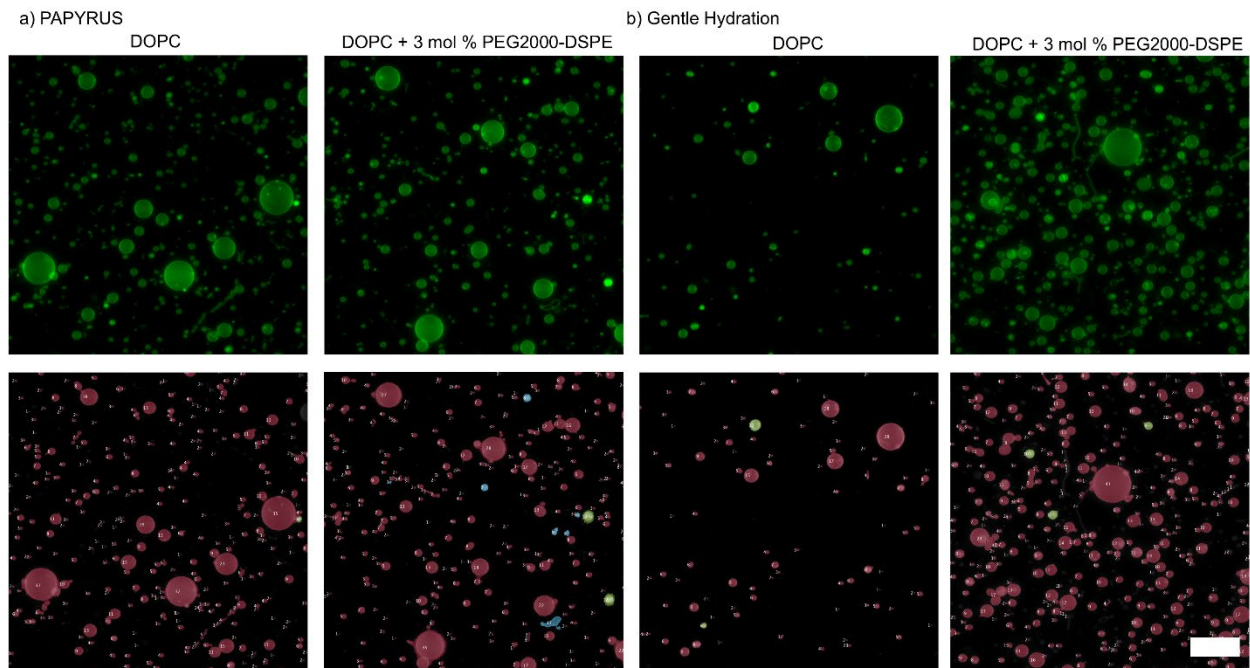

**Fig. S1** Representative images of harvested objects from samples shown in Fig. 1 in the main text. The bottom row show montages of harvested objects that are selected as GUVs (red) and rejected as non-GUV structures (green and blue). The scale bar is 50  $\mu\text{m}$ .

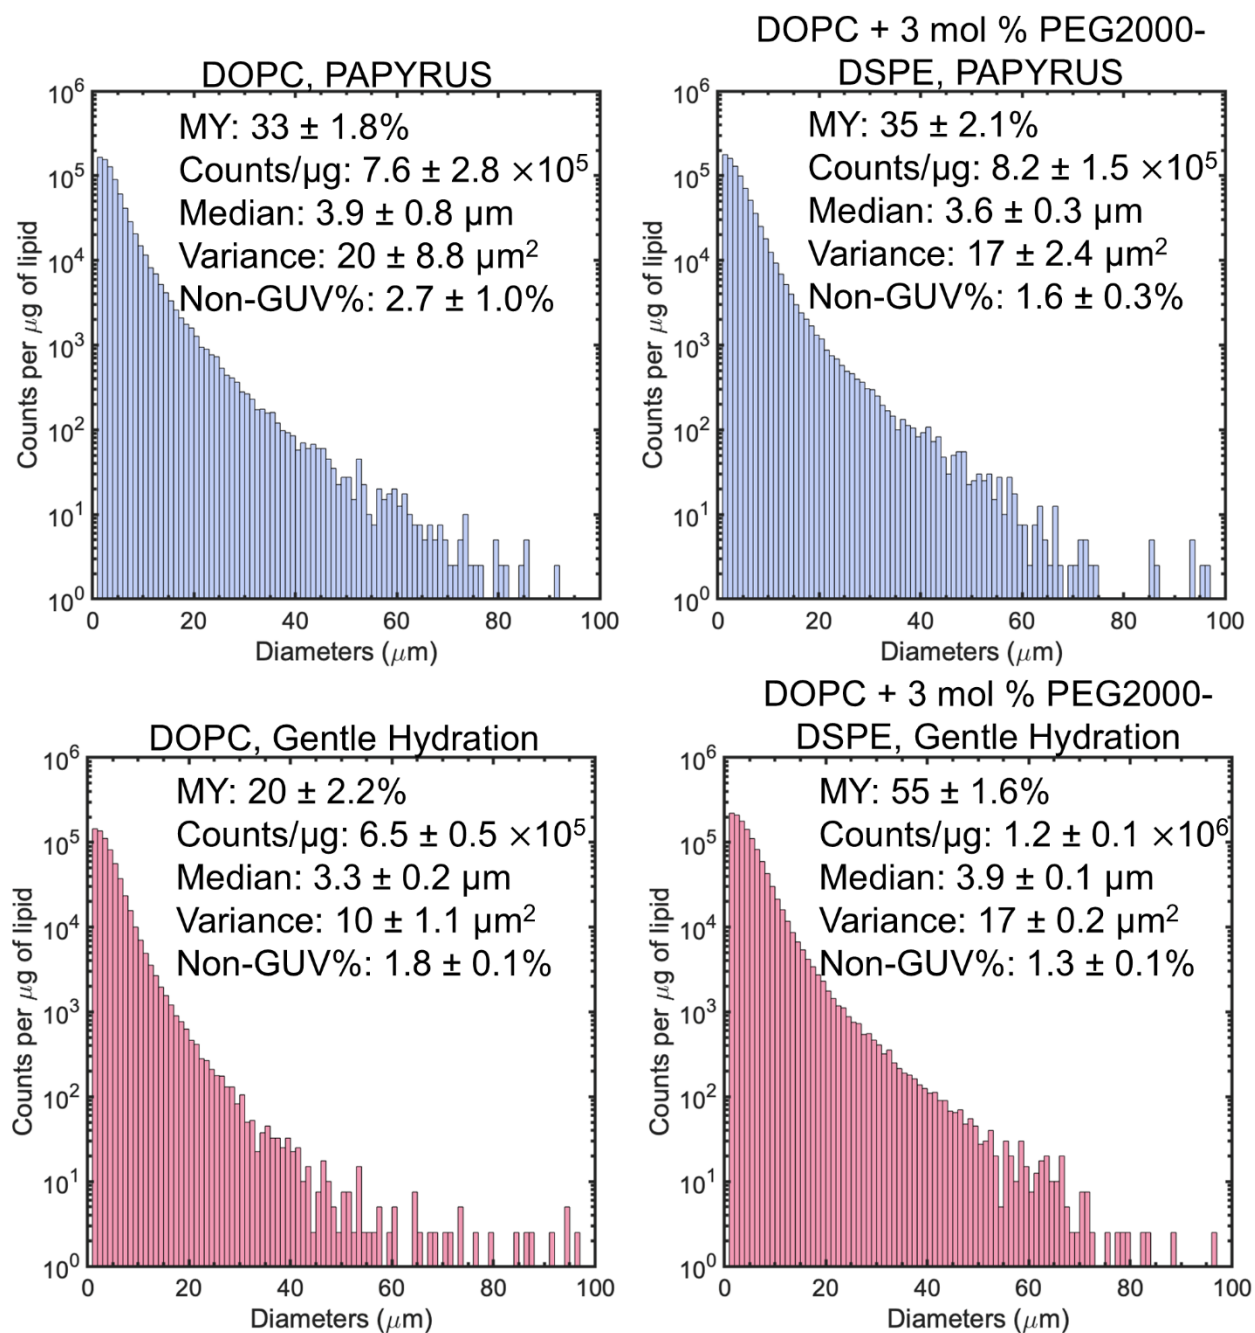

**Fig. S2** Histograms of GUV diameters of the samples shown in Fig. 1 in the main text. Each histogram is the average of  $N=3$  independent repeats. Note the logarithmic scale on the y-axis. Bin widths are  $1 \mu\text{m}$ . The molar yield (MY), total counts per  $\mu\text{g}$  of lipid (counts/ $\mu\text{g}$ ), median diameter, non-GUV % and variance are reported in the text inserts.

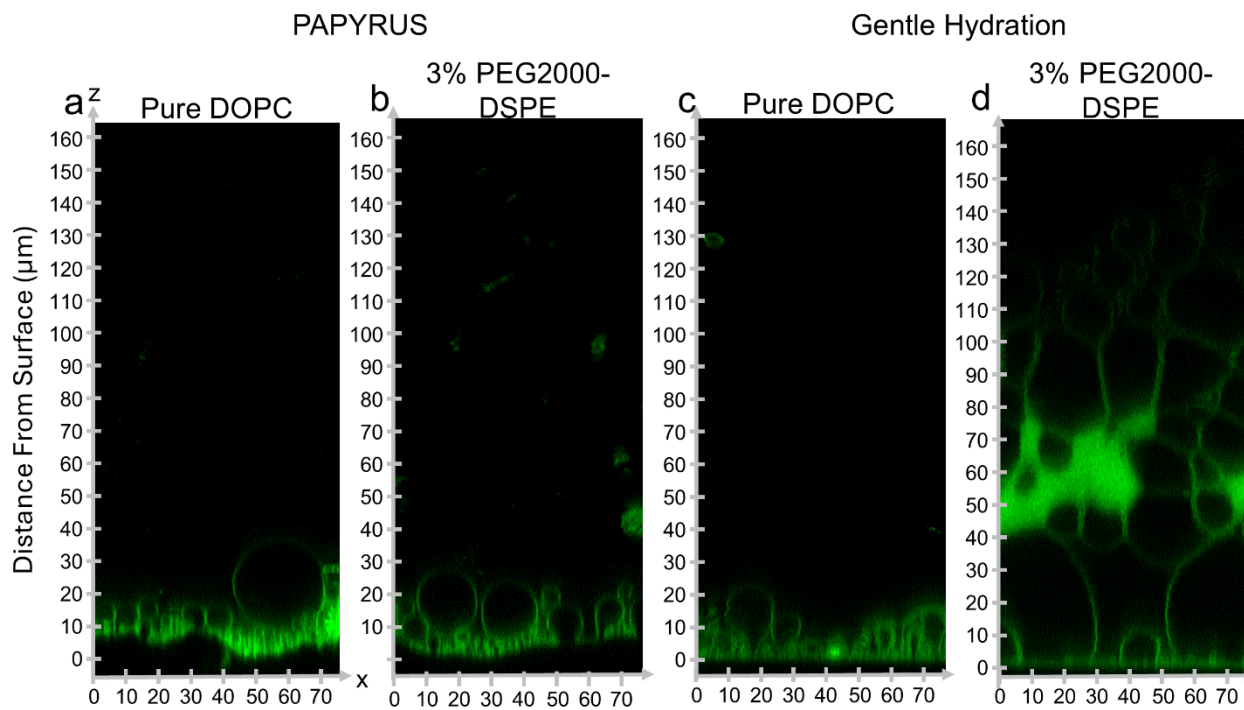

**Fig. S3** Orthogonal  $x$ - $z$  images shown in Fig. 2 in the main text without histogram equalization.

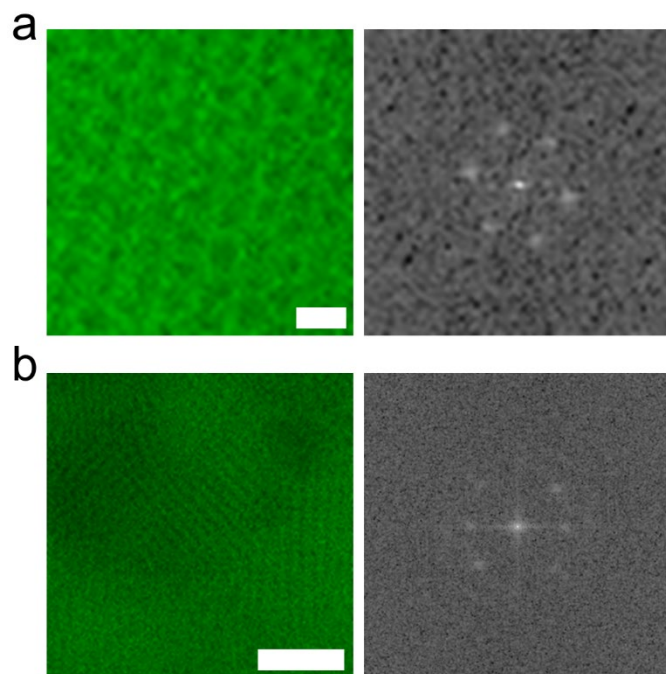

**Fig. S4** Zoomed images of the lipid dense region (left) and its corresponding fast Fourier transform, FFT (right). Scale bars are a) 1  $\mu\text{m}$  and b) 5  $\mu\text{m}$ .

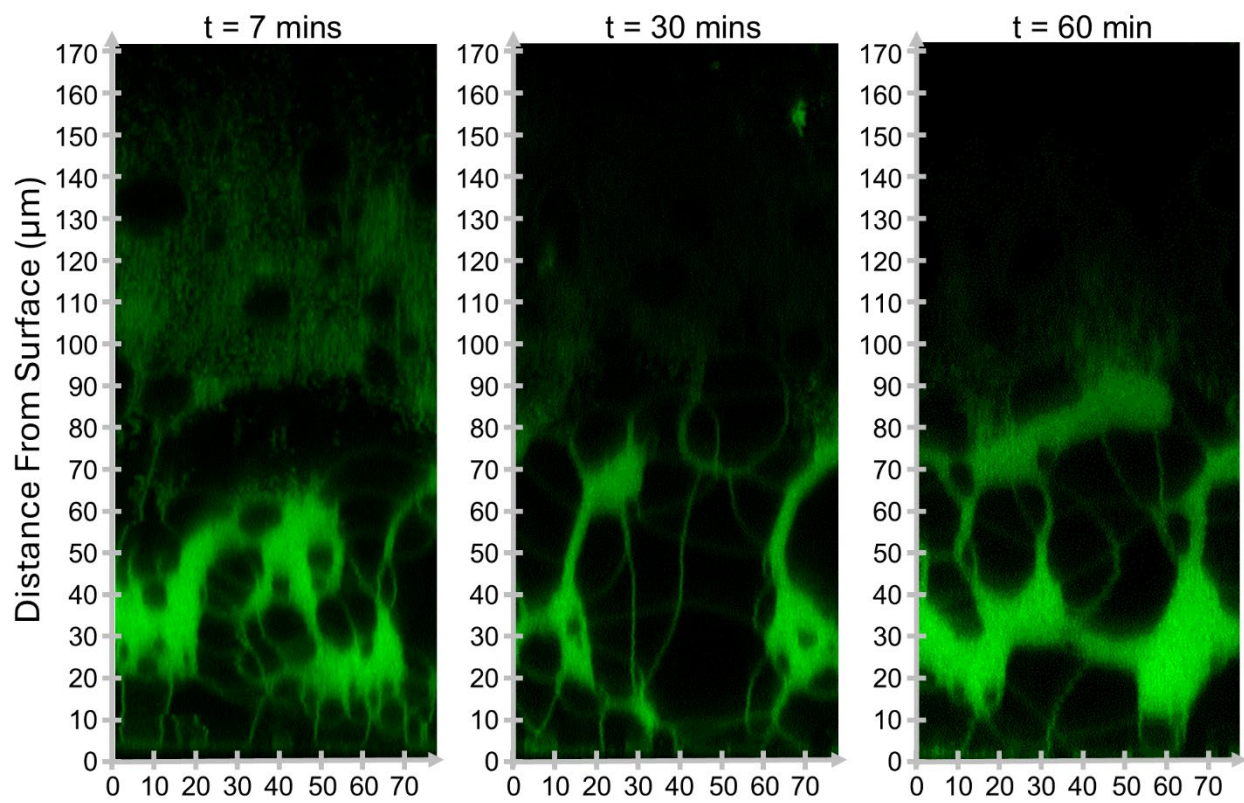

**Fig. S5** Orthogonal  $x$ - $z$  images without histogram equalization shown in Fig. 3 in the main text.

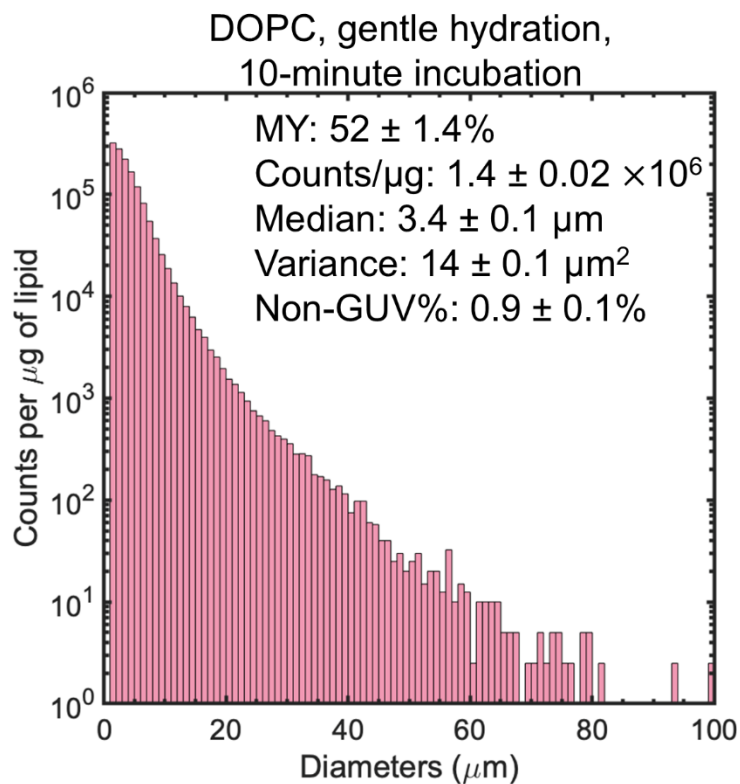

**Fig. S6** Histogram of GUV diameters of the data shown in Figure 3. The histogram is the average of  $N=3$  independent repeats. Note the logarithmic scale on the  $y$ -axis. Bin widths are  $1 \mu\text{m}$ . The molar yield (MY), total counts per  $\mu\text{g}$  of lipid (counts/  $\mu\text{g}$ ), median diameter, non-GUV% and variance are shown in the text insert on the plots.



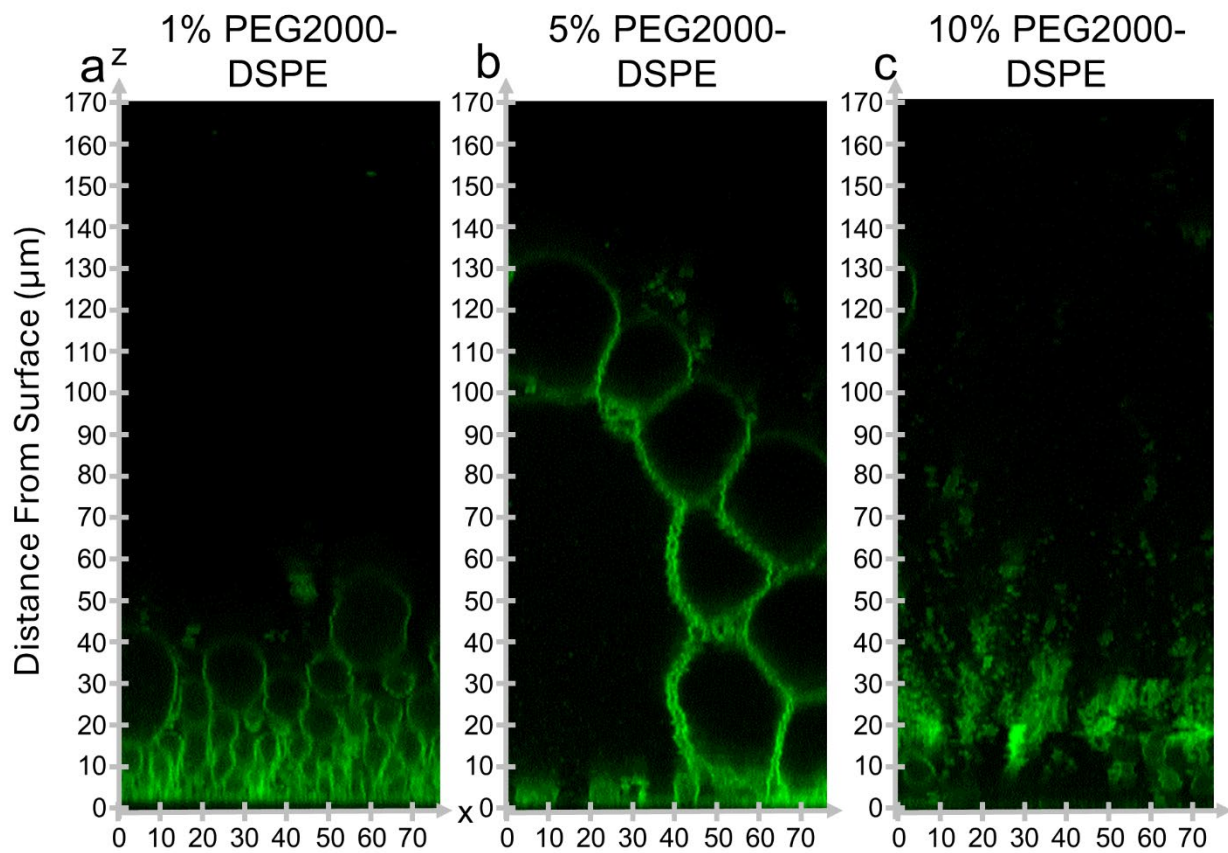

**Fig. S7** Orthogonal  $x$ - $z$  images without histogram equalization shown in Fig. 4 in the main text.

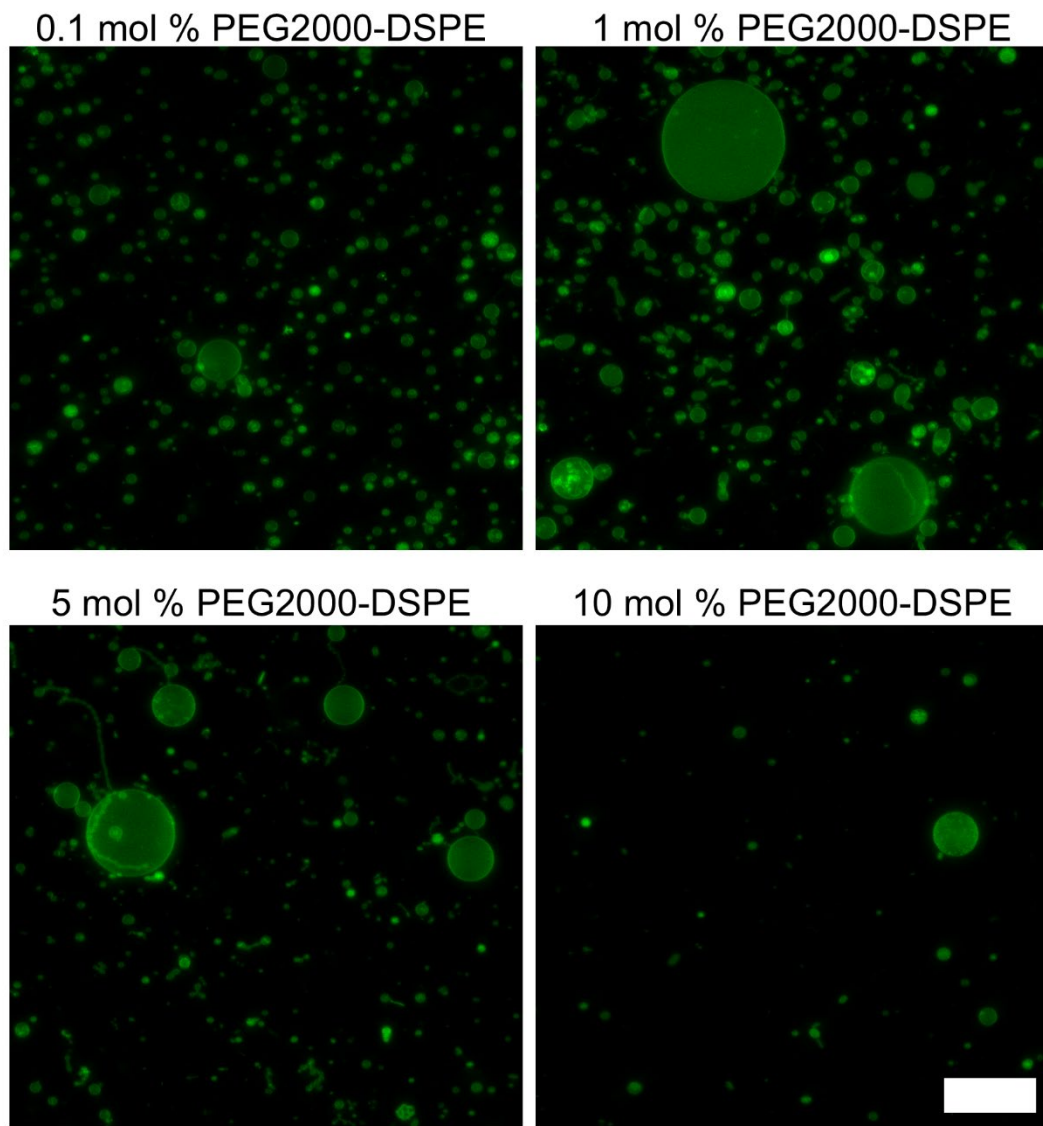

**Fig. S8** Representative images of harvested GUVs from the samples shown in Fig. 4f in the main text. The scale bar is 50  $\mu\text{m}$ .

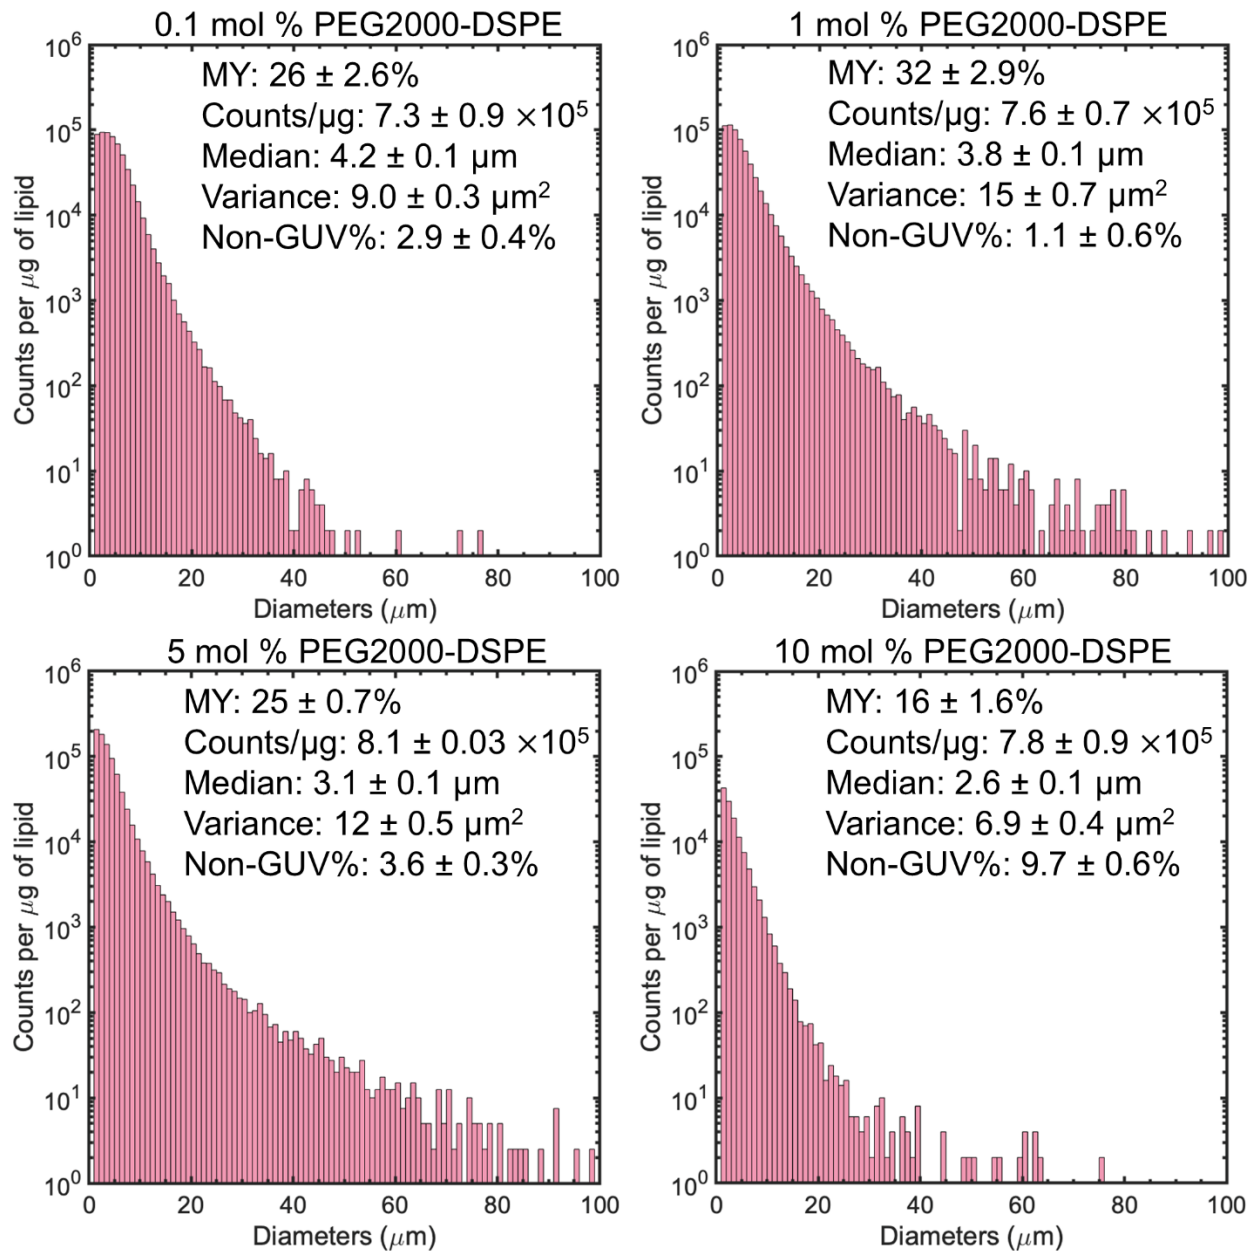

**Fig. S9** Histograms of GUV diameters of samples shown in Fig. 4f in the main text. Each histogram is the average of  $N=3$  independent repeats per sample. Note the logarithmic scale on the y-axis. Bin widths are  $1 \mu\text{m}$ . The molar yield (MY), total counts per  $\mu\text{g}$  of lipid (counts/ $\mu\text{g}$ ), median diameter, non-GUV% and variance are shown in the text insert on the plots.

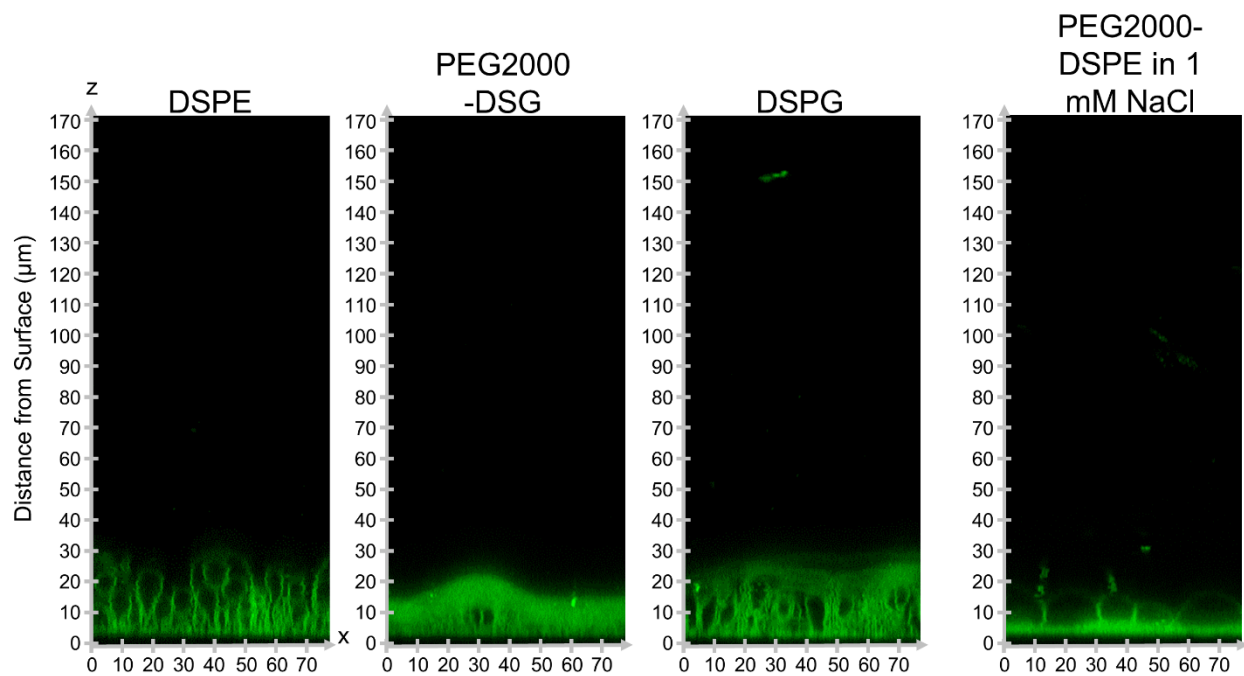

**Fig. S10** Orthogonal  $x$ - $z$  images without histogram equalization shown in Fig. 5 in the main text.

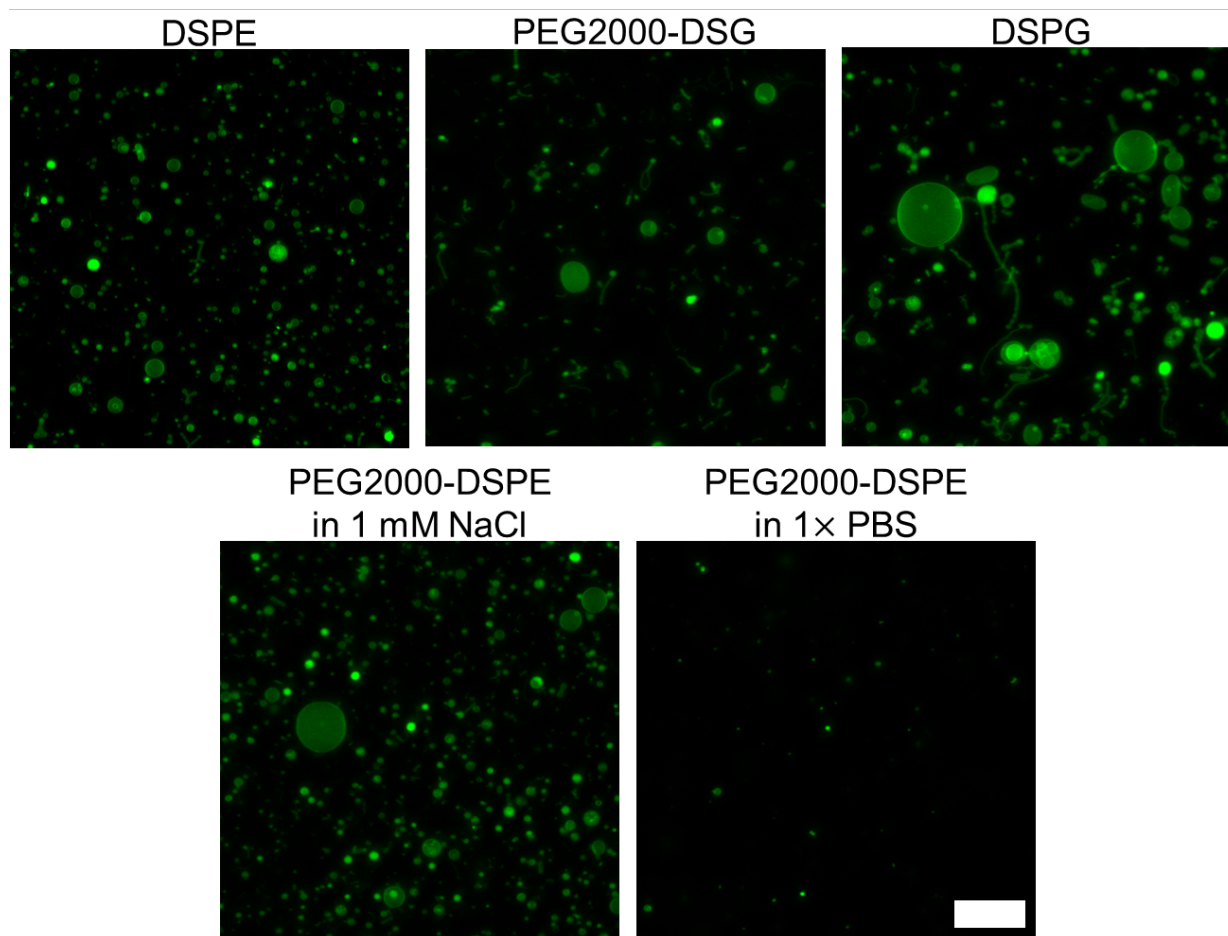

**Fig. S11** Representative harvested images from the samples imaged for Fig. 6 in the main text.

Scale bar is 50  $\mu\text{m}$ .

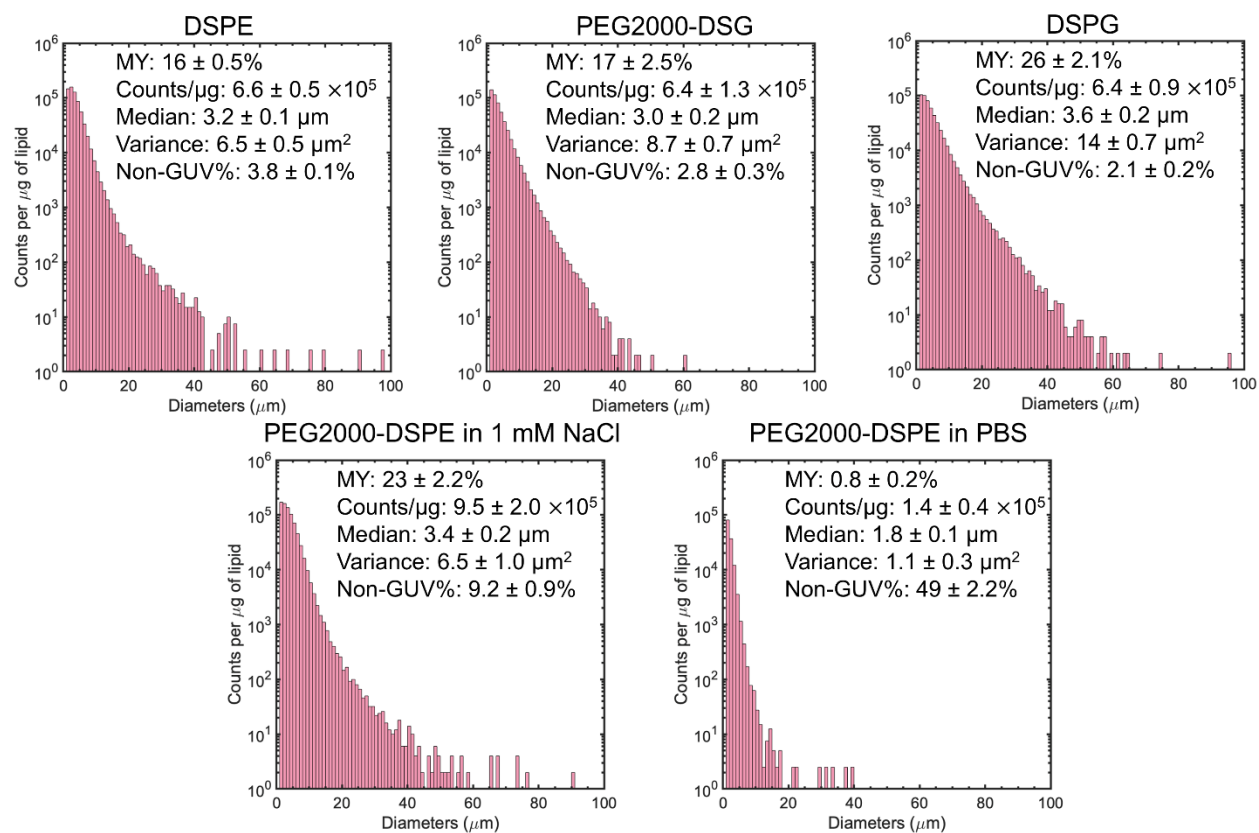

**Fig. S12** Histograms of GuV diameters of samples shown in Fig. 6 in the main text. Each histogram is the average of N=3 independent repeats per sample. Note the logarithmic scale on the y-axis. Bin widths are 1 μm. The molar yield (MY), total counts per μg of lipid (counts/ μg), median diameter, non-GUV% and variance are shown in the text insert on the plots.



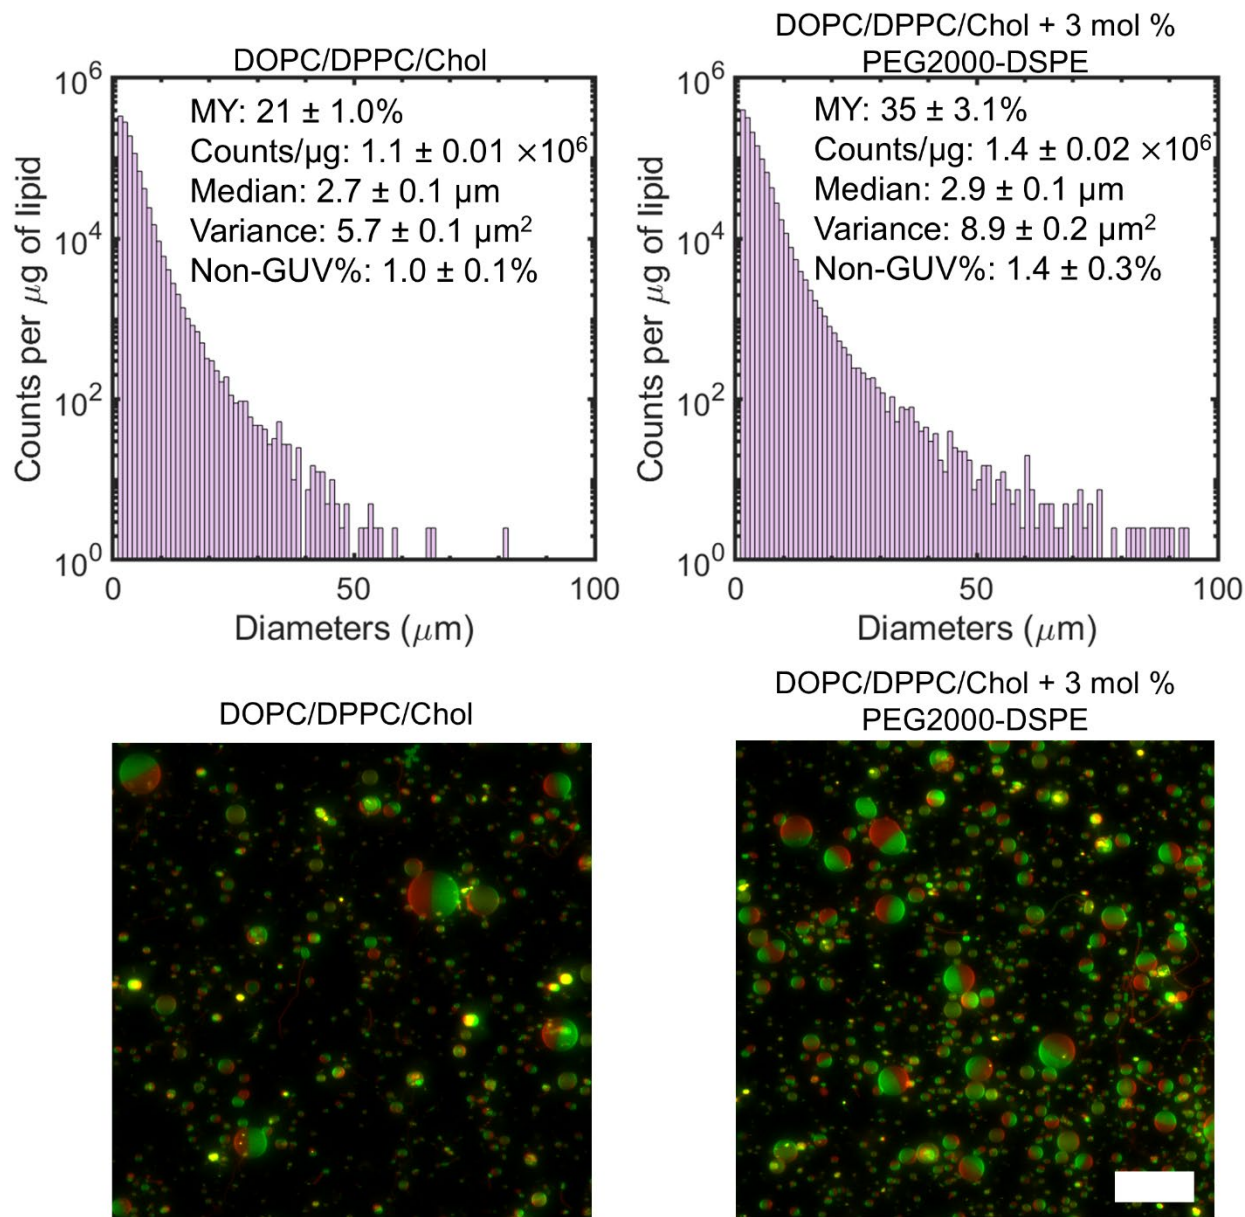

**Fig. S13** Histograms of GUV diameters and representative images from DOPC/DPPC/Chol and DOPC/DPPC/Chol + 3 mol % PEG2000-DSPE samples in Figure 7. The histograms in the top row show the average of  $N=3$  independent repeats per sample. Note the logarithmic scale on the y-axis. Bin widths are  $1 \mu\text{m}$ . The molar yield (MY), total counts per  $\mu\text{g}$  of lipid (counts/ $\mu\text{g}$ ), median diameter, non-GUV% and variance are shown in the text insert on the plots. Scale bar is  $50 \mu\text{m}$ .

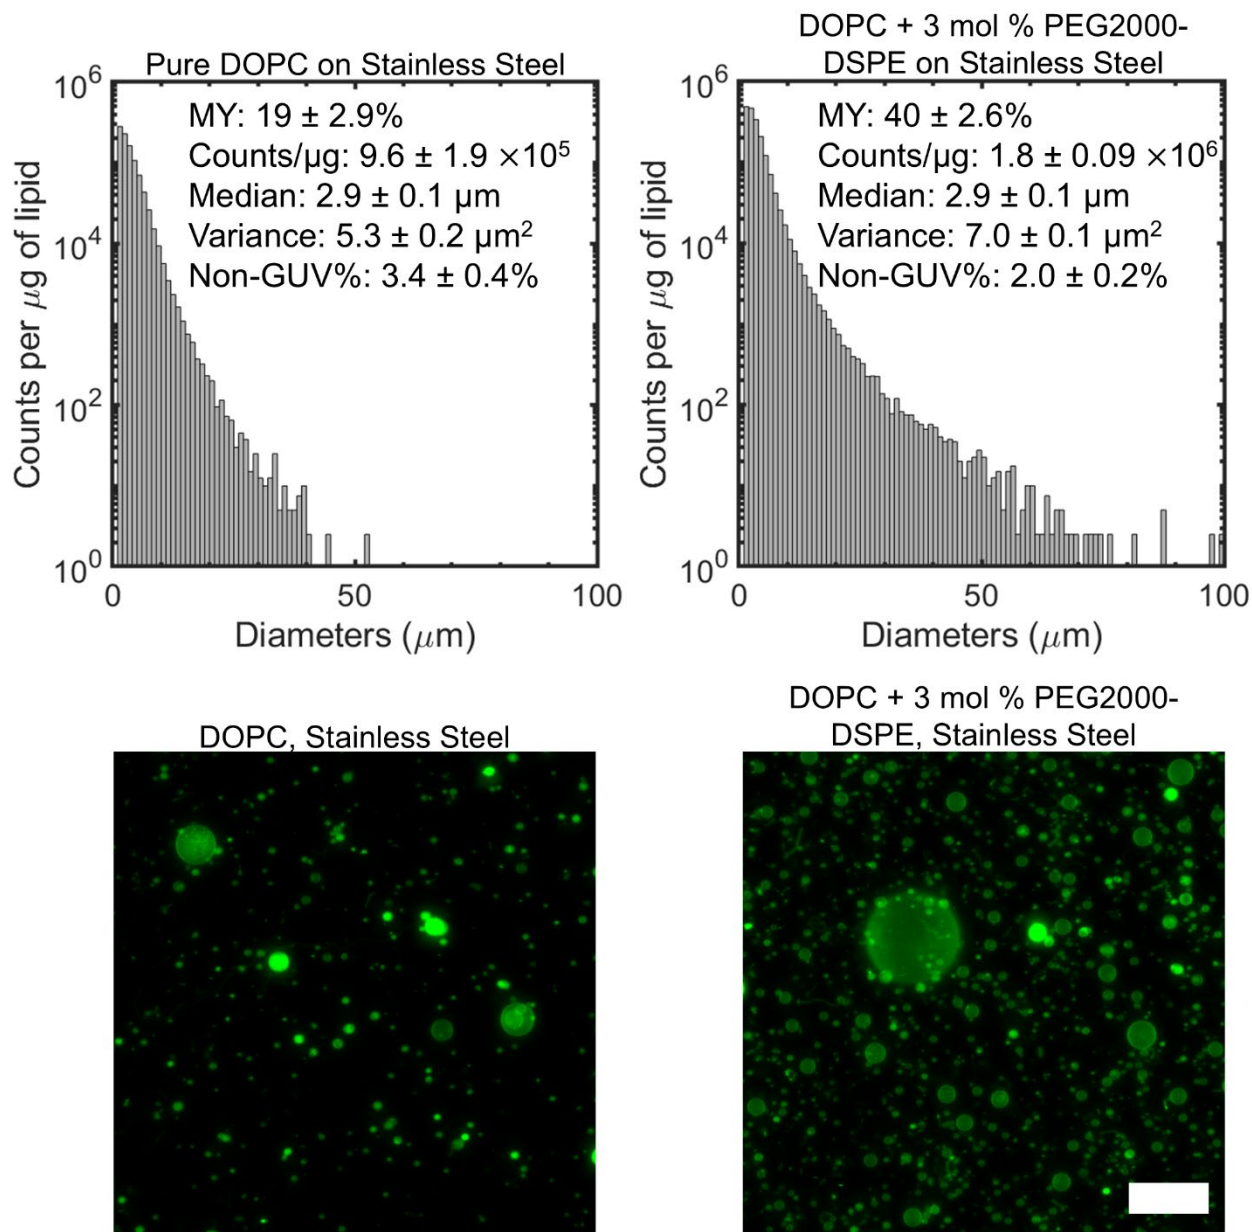

**Fig. S14** Histograms of GUV diameters and representative images from DOPC/DPPC/Chol and DOPC/DPPC/Chol + 3 mol % PEG2000-DSPE samples in Fig. 7 in the main text. The histograms in the top row show the average of N=3 independent repeats per sample. Note the logarithmic scale on the y-axis. Bin widths are 1  $\mu\text{m}$ . The molar yield (MY), total counts per  $\mu\text{g}$  of lipid (counts/ $\mu\text{g}$ ), median diameter, non-GUV% and variance are shown in the text insert on the plots. Scale bar is 50  $\mu\text{m}$ .



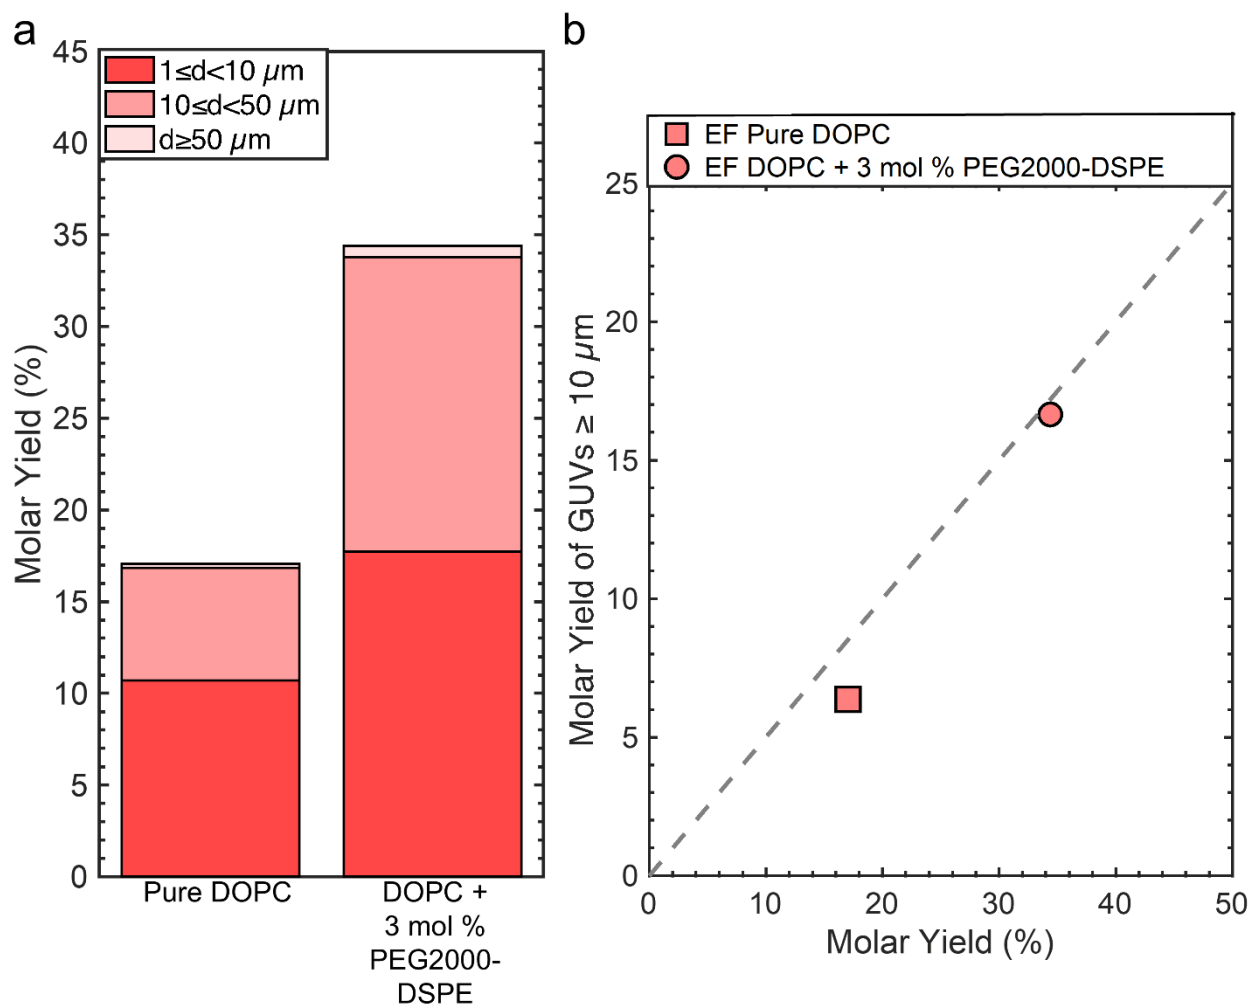

**Fig. S15** Molar yields of PEGylated and PEG-free GUVs obtained from electroformation on ITO glass. a) Stacked bar plots showing molar yields of GUVs obtained from electroformation on ITO glass. The stacks show the percentage of the molar yield that is comprised of the size classifications as listed in the legend. b) Scatter plot showing the molar yield of GUVs with diameters  $\geq 10 \mu\text{m}$  versus the total molar yield. The grey dashed line indicates where half the lipid molecules are in GUVs with diameters  $\geq 10 \mu\text{m}$ .

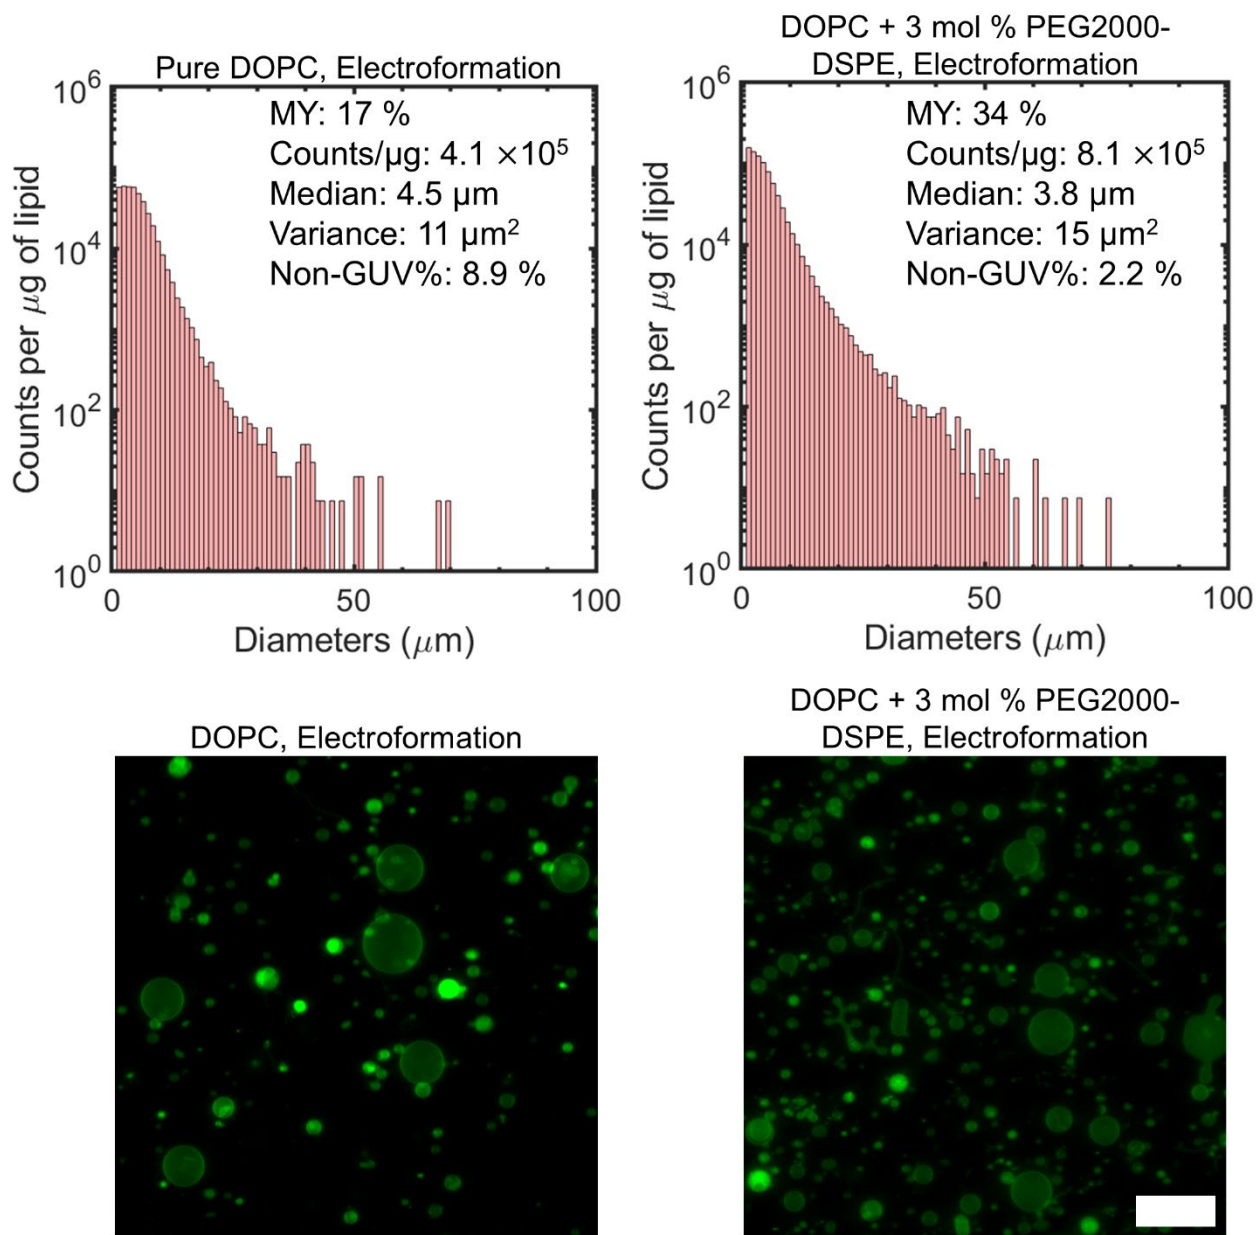

**Fig. S16** Histograms of GUV diameters and representative images from PEGylated and PEG-free GUVs obtained from electroformation on ITO glass. The histograms are from N=1 independent repeats per sample. Note the logarithmic scale on the y-axis. Bin widths are 1  $\mu\text{m}$ . The molar yield (MY), total counts per  $\mu\text{g}$  of lipid (counts/ $\mu\text{g}$ ), median diameter, non-GUV% and variance are shown in the text insert on the plots. Scale bar is 50  $\mu\text{m}$ .

| <b>Group 1</b>                                | <b>Group 2</b>                                                     | <b><i>p</i>-value</b> | <b>Significance</b> | <b>Interpretation</b>                                                                                                   |
|-----------------------------------------------|--------------------------------------------------------------------|-----------------------|---------------------|-------------------------------------------------------------------------------------------------------------------------|
| PAPYRUS,<br>Pure DOPC                         | PAPYRUS,<br>DOPC + 3 mol<br>% PEG2000-<br>DSPE                     | 0.451                 | NS                  | 3 mol %<br>PEG2000-DSPE<br>did not result in a<br>significant change<br>in molar yield<br>using PAPYRUS                 |
| Gentle<br>Hydration on<br>Glass, Pure<br>DOPC | Gentle<br>Hydration on<br>Glass, DOPC +<br>3 mol %<br>PEG2000-DSPE | $5.22 \times 10^{-5}$ | ***                 | 3 mol %<br>PEG2000-DSPE<br>results in a<br>significant increase<br>in molar yield<br>using gentle<br>hydration on glass |

**Table S1.** Table of *p*-values from Student's *t*-tests of the molar yields of GUVs obtained from PAPRYUS and gentle hydration on glass using DOPC with and without 3 mol % PEG2000-DSPE.

\*:  $p < 0.05$ , \*\*:  $p < 0.01$ , \*\*\*:  $p < 0.001$ , NS: not significant.

| <b>Group 1</b>                                  | <b>Group 2</b>                                  | <b><i>p</i>-value</b> | <b>Significance</b> | <b>Interpretation</b>                                                                   |
|-------------------------------------------------|-------------------------------------------------|-----------------------|---------------------|-----------------------------------------------------------------------------------------|
| Gentle Hydration on Glass, 60 minute incubation | Gentle Hydration on Glass, 10 minute incubation | 0.118                 | NS                  | Incubation for 10 minutes is not significantly different than incubation for 60 minutes |

**Table S2.** The *p*-value from a Student's t-test of the molar yields of GUVs obtained from gentle hydration on glass using DOPC with 3 mol % PEG2000-DSPE harvested at 60 minutes and 10 minutes. \*:  $p < 0.05$ , \*\*:  $p < 0.01$ , \*\*\*:  $p < 0.001$ , NS: not significant.

| Source  | SS       | 'df' | 'MS'    | 'F'    | 'Prob>F'              |
|---------|----------|------|---------|--------|-----------------------|
| Columns | 2860.373 | 5    | 572.074 | 89.746 | 4.43×10 <sup>-9</sup> |
| Error   | 76.492   | 12   | 6.3743  |        |                       |
| Total   | 2936.866 | 17   |         |        |                       |

| Group 1   | Group 2   | <i>p</i> -value       | Significance | Interpretation                                                                                   |
|-----------|-----------|-----------------------|--------------|--------------------------------------------------------------------------------------------------|
| 0 mol %   | 0.1 mol % | 0.119                 | NS           | The addition of 0.1 mol % of PEG2000-DSPE did not result in a significant change in molar yield. |
| 0 mol %   | 1 mol %   | 7.76×10 <sup>-4</sup> | ***          | The addition of 1 mol % of PEG2000-DSPE resulted in a significant change in molar yield.         |
| 0 mol %   | 3 mol %   | 1.11×10 <sup>-8</sup> | ***          | The addition of 3 mol % of PEG2000-DSPE resulted in a significant change in molar yield.         |
| 0 mol %   | 5 mol %   | 0.170                 | NS           | The addition of 5 mol % of PEG2000-DSPE did not result in a significant change in molar yield.   |
| 0 mol %   | 10 mol %  | 0.439                 | NS           | The addition of 10 mol % of PEG2000-DSPE did not result in a significant change in molar yield.  |
| 0.1 mol % | 1 mol %   | 0.079                 | NS           | There is no significant difference between the addition of 0.1 and 1 mol % PEG2000-DSPE.         |
| 0.1 mol % | 3 mol %   | 9.32×10 <sup>-8</sup> | ***          | There is a significant difference between 0.1 and 3 mol % PEG2000-DSPE.                          |

|           |          |                       |     |                                                                                          |
|-----------|----------|-----------------------|-----|------------------------------------------------------------------------------------------|
| 0.1 mol % | 5 mol %  | 0.999                 | NS  | There is no significant difference between the addition of 0.1 and 5 mol % PEG2000-DSPE. |
| 0.1 mol % | 10 mol % | 0.005                 | **  | There is a significant difference between the addition of 0.1 and 10 mol % PEG2000-DSPE. |
| 1 mol %   | 3 mol %  | $1.47 \times 10^{-6}$ | *** | There is a significant difference between the addition of 1 and 3 mol % PEG2000-DSPE.    |
| 1 mol %   | 5 mol %  | 0.054                 | NS  | There is no significant difference between the addition of 3 and 5 mol % PEG2000-DSPE.   |
| 1 mol %   | 10 mol % | $5.38 \times 10^{-5}$ | *** | There is a significant difference between the addition of 1 and 10 mol % PEG2000-DSPE.   |
| 3 mol %   | 5 mol %  | $7.75 \times 10^{-8}$ | *** | There is a significant difference between the addition of 1 and 10 mol % PEG2000-DSPE.   |
| 3 mol %   | 10 mol % | $3.01 \times 10^{-9}$ | *** | There is a significant difference between the addition of 3 and 10 mol % PEG2000-DSPE.   |
| 5 mol %   | 10 mol % | 0.007                 | **  | There is a significant difference between the addition of 5 and 10 mol % PEG2000-DSPE.   |

**Table S3.** ANOVA table and table of p-values from post hoc Tukey's HSD tests of the molar yields of GUVs obtained from gentle hydration on glass with DOPC with 0-10 mol % PEG2000-DSPE. \*:  $p < 0.05$ , \*\*:  $p < 0.01$ , \*\*\*:  $p < 0.001$ , NS: not significant.

| Source  | SS      | 'df' | 'MS'   | 'F'   | 'Prob>F' |
|---------|---------|------|--------|-------|----------|
| Columns | 172.811 | 3    | 57.604 | 9.741 | 0.00478  |
| Error   | 47.307  | 8    | 5.913  |       |          |
| Total   | 220.118 | 11   |        |       |          |

| Group 1     | Group 2     | <i>p</i> -value       | Significance | Interpretation                                                                                                         |
|-------------|-------------|-----------------------|--------------|------------------------------------------------------------------------------------------------------------------------|
| DOPC        | DSPE        | 0.184                 | NS           | Addition of 3 mol % DSPE does not result in a significant change in yield from pure DOPC                               |
| DOPC        | PEG2000-DSG | 0.541                 | NS           | Addition of 3 mol % PEG2000-DSG (steric repulsion) does not result in a significant change in yield from pure DOPC     |
| DOPC        | DSPG        | 0.091                 | NS           | Addition of 3 mol % DSPG (electrostatic repulsion) does not result in a significant change in yield from pure DOPC     |
| DSPE        | PEG2000-DSG | 0.811                 | NS           | The yields of mixtures containing 3 mol % DSPE and 3 mol % PEG2000-DSG are not significantly different from each other |
| DSPE        | DSPG        | $4.34 \times 10^{-3}$ | **           | The yields of mixtures containing 3 mol % DSPE and 3 mol % DSPG are significantly different from each other            |
| PEG2000-DSG | DSPG        | $1.34 \times 10^{-2}$ | *            | The yields of mixtures containing 3 mol % PEG2000-DSG and 3 mol % DSPG are significantly different from each other     |

**Table S4.** ANOVA table and table of p-values from post hoc Tukey's HSD tests of the molar yields of GUVs obtained from gentle hydration on glass with pure DOPC and DOPC + 3 mol % PEG2000-DSG, DSPG, or DSPE. \*:  $p < 0.05$ , \*\*:  $p < 0.01$ , \*\*\*:  $p < 0.001$ , NS: not significant.



| <b>Group</b>   | <b>Group 2</b>                              | <b><i>p</i>-value</b> | <b>Significance</b> | <b>Interpretation</b>                                                       |
|----------------|---------------------------------------------|-----------------------|---------------------|-----------------------------------------------------------------------------|
| DOPC/DPPC/Chol | DOPC/DPPC/Chol<br>+ 3 mol %<br>PEG2000-DSPE | $4.06 \times 10^{-3}$ | **                  | Addition of 3 mol % PEG2000-DSPE results in a significant increase in yield |

**Table S5.** The *p*-value from a Student's t-test of the molar yields of GUVs obtained from gentle hydration on glass using DOPC/DPPC/Cholesterol with and without 3 mol % PEG2000-DSPE. \*:  $p < 0.05$ , \*\*:  $p < 0.01$ , \*\*\*:  $p < 0.001$ , NS: not significant.

| <b>Group 1</b>               | <b>Group 2</b>                                      | <b><i>p</i>-value</b> | <b>Significance</b> | <b>Interpretation</b>                                                       |
|------------------------------|-----------------------------------------------------|-----------------------|---------------------|-----------------------------------------------------------------------------|
| Pure DOPC on stainless steel | Pure DOPC + 3 mol % PEG2000-DSPE on stainless steel | $1.40 \times 10^{-3}$ | **                  | Addition of 3 mol % PEG2000-DSPE results in a significant increase in yield |

**Table S6.** The *p*-value from a Student's t-test of the molar yields of GUVs obtained from gentle hydration on glass using DOPC with and without 3 mol % PEG2000-DSPE on stainless steel. \*:  $p < 0.05$ , \*\*:  $p < 0.01$ , \*\*\*:  $p < 0.001$ , NS: not significant.
